# Supplementary material
Source: MDPI journal article supplement (https://www.mdpi.com/2071-1050/14/14/8953)
Supplement: s1 [file s1 › sustainability-1807290-supplementary.pdf]

**Table S1.** Current and potential applications of the reviewed process-based models

[illegible]

|                                                                                                       |   |   |  |  |   |   |   |  |
|-------------------------------------------------------------------------------------------------------|---|---|--|--|---|---|---|--|
| Environmental cost and benefits of converting forest land into agricultural land and vice versa       | X | X |  |  |   | X | X |  |
| Economic and social cost and benefits of converting forest land into agricultural land and vice versa | X | X |  |  |   | X |   |  |
| Environmental cost and benefit of converting marginal land into agricultural land                     | X | X |  |  | X | X | X |  |
| Economic and social cost and benefits of converting marginal land into agricultural land              |   |   |  |  |   |   |   |  |

|                                                                                             |   |   |  |  |   |   |   |   |
|---------------------------------------------------------------------------------------------|---|---|--|--|---|---|---|---|
| Environmental cost and benefits of changing land uses as a result of spatial planning       | X | X |  |  | X | X | X | X |
| Economic and social cost and benefits of changing land uses as a result of spatial planning | X | X |  |  | X | X |   |   |
| Environmental cost and benefits of changing crops in an agricultural landscape              | X | X |  |  | X | X | X |   |
| Economic and social cost and benefits of changing crops in an agricultural landscape        | X | X |  |  | X | X |   |   |
| Environmental cost and benefits of intensifying or                                          | X | X |  |  |   | X | X |   |

|                                                                                                          |   |   |  |  |   |   |  |   |
|----------------------------------------------------------------------------------------------------------|---|---|--|--|---|---|--|---|
| reducing cropping                                                                                        |   |   |  |  |   |   |  |   |
| Economic and social cost and benefits of intensifying or reducing cropping                               |   |   |  |  |   |   |  |   |
| Cost and benefits of afforesting of erodible lands                                                       | X | X |  |  | X | X |  | X |
| Cost and benefits of reconfiguring agricultural land use                                                 | X | X |  |  | X | X |  |   |
| Identification of optimal agricultural land use patterns based on ecological and economic considerations | X | X |  |  | X | X |  |   |
| Analysing economic and financial efficiency of land use involving wildlife on private land               | X | X |  |  |   | X |  |   |

|                                                                                         |   |   |  |  |  |   |   |  |
|-----------------------------------------------------------------------------------------|---|---|--|--|--|---|---|--|
| Spatially predict soil moisture for land quality evaluation and land use planning       |   |   |  |  |  |   |   |  |
| Assessing the enhancement of Carbon sequestration through land use changes and planning |   |   |  |  |  |   |   |  |
| Climate, flooding and risk                                                              |   |   |  |  |  |   |   |  |
| Environmental cost and benefits of dikes                                                | X | X |  |  |  | X | X |  |
| Economic and social cost and benefits of dikes                                          | X | X |  |  |  | X |   |  |
| The associated costs and benefits of microclimate as a result of habitat alteration     |   |   |  |  |  |   | X |  |
| Managing rockfall risk through land                                                     |   |   |  |  |  |   |   |  |

|                                                                              |   |   |   |   |   |   |   |  |
|------------------------------------------------------------------------------|---|---|---|---|---|---|---|--|
| use planning and analyzing susceptibility in extensive areas                 |   |   |   |   |   |   |   |  |
| <b>Management practices</b>                                                  |   |   |   |   |   |   |   |  |
| Identifying best management practices                                        | X |   |   | X | X | X | X |  |
| Evaluating management practices                                              | X |   |   | X | X | X | X |  |
| Cost and benefits of altering habitats                                       |   |   |   |   |   |   |   |  |
| Cost and benefits of degraded land rehabilitation                            | X |   |   |   | X | X |   |  |
| Environmental cost and benefits of restoration for impaired river ecosystems |   |   |   |   |   |   |   |  |
| Environmental cost and benefits of adaptation measures to the anthropic-     | X | X | X | X | X | X | X |  |

|                                                                                                                                                    |   |   |   |   |   |   |   |  |
|----------------------------------------------------------------------------------------------------------------------------------------------------|---|---|---|---|---|---|---|--|
| related changes affecting directly or indirectly the water quantity and quality                                                                    |   |   |   |   |   |   |   |  |
| Economic cost and benefits of adaptation measures to the anthropic-related changes affecting directly or indirectly the water quantity and quality | X | X | X | X | X | X |   |  |
| Environmental cost-benefits of management strategies                                                                                               | X |   |   | X | X | X | X |  |
| Economic cost-benefits of management strategies                                                                                                    | X |   |   | X | X | X |   |  |

**SI Table 2.** Current and potential applications of the reviewed statistical models

| Applications                                                                  | Simple statistical bivariate analysis | Multivariate regression model (Olive trees) | Spatial prediction |
|-------------------------------------------------------------------------------|---------------------------------------|---------------------------------------------|--------------------|
| <b>Hydropower dams</b>                                                        |                                       |                                             |                    |
| Environmental cost and benefits of dam removal                                |                                       |                                             |                    |
| Environmental cost and benefits of dam construction                           |                                       |                                             |                    |
| Environmental cost and benefits of dam operation                              |                                       |                                             |                    |
| Economic and social cost and benefits of dam removal, construction, operation |                                       |                                             |                    |
| <b>Changing land use</b>                                                      |                                       |                                             |                    |
| Environmental cost and benefits of converting forest land into agricultural   |                                       |                                             |                    |

|                                                                                                       |  |  |  |
|-------------------------------------------------------------------------------------------------------|--|--|--|
| land and vice versa                                                                                   |  |  |  |
| Economic and social cost and benefits of converting forest land into agricultural land and vice versa |  |  |  |
| Environmental cost and benefit of converting marginal land into agricultural land                     |  |  |  |
| Economic and social cost and benefits of converting marginal land into agricultural land              |  |  |  |
| Environmental cost and benefits of changing land uses as a result of spatial planning                 |  |  |  |

|                                                                                             |  |  |  |
|---------------------------------------------------------------------------------------------|--|--|--|
| Economic and social cost and benefits of changing land uses as a result of spatial planning |  |  |  |
| Environmental cost and benefits of changing crops in an agricultural landscape              |  |  |  |
| Economic and social cost and benefits of changing crops in an agricultural landscape        |  |  |  |
| Environmental cost and benefits of intensifying or reducing cropping                        |  |  |  |
| Economic and social cost and benefits of intensifying or reducing cropping                  |  |  |  |

|                                                                                                          |  |  |   |
|----------------------------------------------------------------------------------------------------------|--|--|---|
| Cost and benefits of afforesting of erodible lands                                                       |  |  |   |
| Cost and benefits of reconfiguring agricultural land use                                                 |  |  |   |
| Identification of optimal agricultural land use patterns based on ecological and economic considerations |  |  |   |
| Analysing economic and financial efficiency of land use involving wildlife on private land               |  |  |   |
| Spatially predict soil moisture for land quality evaluation and land use planning                        |  |  | X |

|                                                                                                  |          |  |  |
|--------------------------------------------------------------------------------------------------|----------|--|--|
| Assessing the enhancement of Carbon sequestration through land use changes and planning          |          |  |  |
| <b>Climate, flooding and risk</b>                                                                |          |  |  |
| Environmental cost and benefits of dikes                                                         |          |  |  |
| Economic and social cost and benefits of dikes                                                   |          |  |  |
| The associated costs and benefits of microclimate as a result of habitat alteration              |          |  |  |
| Managing rockfall risk through land use planning and analyzing susceptibility in extensive areas | <b>X</b> |  |  |
| <b>Management practices</b>                                                                      |          |  |  |

|                                                                                                                                                         |  |  |  |
|---------------------------------------------------------------------------------------------------------------------------------------------------------|--|--|--|
| Identifying best management practices                                                                                                                   |  |  |  |
| Evaluating management practices                                                                                                                         |  |  |  |
| Cost and benefits of altering habitats                                                                                                                  |  |  |  |
| Cost and benefits of degraded land rehabilitation                                                                                                       |  |  |  |
| Environmental cost and benefits of restoration for impaired river ecosystems                                                                            |  |  |  |
| Environmental cost and benefits of adaptation measures to the anthropic-related changes affecting directly or indirectly the water quantity and quality |  |  |  |

|                                                                                                                                                    |  |          |  |
|----------------------------------------------------------------------------------------------------------------------------------------------------|--|----------|--|
| Economic cost and benefits of adaptation measures to the anthropic-related changes affecting directly or indirectly the water quantity and quality |  |          |  |
| Environmental cost-benefits of management strategies                                                                                               |  |          |  |
| Economic cost-benefits of management strategies                                                                                                    |  | <b>X</b> |  |

**Table S3.** Current and potential applications of reviewed probabilistic and data-driven models

|              |                                |                     |
|--------------|--------------------------------|---------------------|
|              | Probabilistic Models           | Data-driven models  |
| Applications | Favorability function approach | Decision tree model |

| Hydropower dams                                                                                 |  |  |
|-------------------------------------------------------------------------------------------------|--|--|
| Environmental cost and benefits of dam removal                                                  |  |  |
| Environmental cost and benefits of dam construction                                             |  |  |
| Environmental cost and benefits of dam operation                                                |  |  |
| Economic and social cost and benefits of dam removal, construction, operation                   |  |  |
| Changing land use                                                                               |  |  |
| Environmental cost and benefits of converting forest land into agricultural land and vice versa |  |  |
| Economic and social cost and benefits of converting forest land into                            |  |  |

|                                                                                                               |  |  |
|---------------------------------------------------------------------------------------------------------------|--|--|
| agricultural<br>land and vice<br>versa                                                                        |  |  |
| Environmental<br>cost and benefit<br>of converting<br>marginal land<br>into<br>agricultural<br>land           |  |  |
| Economic and<br>social cost and<br>benefits of<br>converting<br>marginal land<br>into<br>agricultural<br>land |  |  |
| Environmental<br>cost and<br>benefits of<br>changing land<br>uses as a result<br>of spatial<br>planning       |  |  |
| Economic and<br>social cost and<br>benefits of<br>changing land<br>uses as a result<br>of spatial<br>planning |  |  |

|                                                                                      |  |  |
|--------------------------------------------------------------------------------------|--|--|
| Environmental cost and benefits of changing crops in an agricultural landscape       |  |  |
| Economic and social cost and benefits of changing crops in an agricultural landscape |  |  |
| Environmental cost and benefits of intensifying or reducing cropping                 |  |  |
| Economic and social cost and benefits of intensifying or reducing cropping           |  |  |
| Cost and benefits of afforesting of erodible lands                                   |  |  |
| Cost and benefits of reconfiguring                                                   |  |  |

|                                                                                                                               |  |  |
|-------------------------------------------------------------------------------------------------------------------------------|--|--|
| agricultural<br>land use                                                                                                      |  |  |
| Identification of<br>optimal<br>agricultural<br>land use<br>patterns based<br>on ecological<br>and economic<br>considerations |  |  |
| Analyzing<br>economic and<br>financial<br>efficiency<br>of land<br>use involving<br>wildlife on<br>private land               |  |  |
| Spatially<br>predict soil<br>moisture for<br>land quality<br>evaluation<br>and land<br>use planning                           |  |  |
| Assessing the<br>enhancement of<br>Carbon<br>sequestration<br>through land<br>use changes<br>and planning                     |  |  |
| Climate, flooding and risk                                                                                                    |  |  |

|                                                                                                  |   |  |
|--------------------------------------------------------------------------------------------------|---|--|
| Environmental cost and benefits of dikes                                                         |   |  |
| Economic and social cost and benefits of dikes                                                   |   |  |
| The associated costs and benefits of microclimate as a result of habitat alteration              |   |  |
| Managing rockfall risk through land use planning and analyzing susceptibility in extensive areas | X |  |
| <b>Management practices</b>                                                                      |   |  |
| Identifying best management practices                                                            |   |  |
| Evaluating management practices                                                                  |   |  |
| Cost and benefits of altering habitats                                                           |   |  |

|                                                                                                                                                         |  |          |
|---------------------------------------------------------------------------------------------------------------------------------------------------------|--|----------|
| Cost and benefits of degraded land rehabilitation                                                                                                       |  |          |
| Environmental cost and benefits of restoration for impaired river ecosystems                                                                            |  |          |
| Environmental cost and benefits of adaptation measures to the anthropic-related changes affecting directly or indirectly the water quantity and quality |  | <b>X</b> |
| Economic cost and benefits of adaptation measures to the anthropic-related changes affecting directly or indirectly the water quantity and quality      |  | <b>X</b> |



|                                                                                                     |  |  |  |   |  |   |  |  |  |  |   |   |   |
|-----------------------------------------------------------------------------------------------------|--|--|--|---|--|---|--|--|--|--|---|---|---|
| and<br>benefits of<br>dam<br>removal                                                                |  |  |  |   |  |   |  |  |  |  |   |   |   |
| Environme<br>ntal cost<br>and<br>benefits of<br>dam<br>constructio<br>n                             |  |  |  |   |  |   |  |  |  |  |   |   |   |
| Environme<br>ntal cost<br>and<br>benefits of<br>dam<br>operation                                    |  |  |  |   |  |   |  |  |  |  |   |   |   |
| Economic<br>and social<br>cost and<br>benefits of<br>dam<br>removal,<br>constructio<br>n, operation |  |  |  |   |  |   |  |  |  |  |   |   |   |
| Changing land use                                                                                   |  |  |  |   |  |   |  |  |  |  |   |   |   |
| Environme<br>ntal cost<br>and<br>benefits of<br>converting<br>forest land<br>into                   |  |  |  | X |  | X |  |  |  |  | X | X | X |

|                                                                                                       |  |  |   |   |   |   |   |   |  |   |   |   |   |
|-------------------------------------------------------------------------------------------------------|--|--|---|---|---|---|---|---|--|---|---|---|---|
| agricultural land and vice versa                                                                      |  |  |   |   |   |   |   |   |  |   |   |   |   |
| Economic and social cost and benefits of converting forest land into agricultural land and vice versa |  |  | X | X | X | X |   |   |  | X | X |   | X |
| Environmental cost and benefit of converting marginal land into agricultural land                     |  |  |   |   |   |   |   |   |  |   | X | X |   |
| Economic and social cost and benefits of converting marginal land into agricultural land              |  |  | X |   | X |   |   |   |  | X | X |   |   |
| Environmental cost                                                                                    |  |  |   | X |   |   | X | X |  |   | X | X | X |

|                                                                                                                     |  |  |   |   |   |  |   |   |   |   |   |   |   |
|---------------------------------------------------------------------------------------------------------------------|--|--|---|---|---|--|---|---|---|---|---|---|---|
| and<br>benefits of<br>changing<br>land uses as<br>a result of<br>spatial<br>planning                                |  |  |   |   |   |  |   |   |   |   |   |   |   |
| Economic<br>and social<br>cost and<br>benefits of<br>changing<br>land uses as<br>a result of<br>spatial<br>planning |  |  | X | X | X |  | X | X |   | X | X |   | X |
| Environme<br>ntal cost<br>and<br>benefits of<br>changing<br>crops in an<br>agricultural<br>landscape                |  |  |   |   |   |  |   |   | X |   | X | X | X |
| Economic<br>and social<br>cost and<br>benefits of<br>changing<br>crops in an<br>agricultural<br>landscape           |  |  | X |   | X |  |   |   | X | X | X |   | X |

|                                                                              |  |  |   |   |   |  |  |   |   |   |   |   |   |
|------------------------------------------------------------------------------|--|--|---|---|---|--|--|---|---|---|---|---|---|
| Environmental cost and benefits of intensifying or reducing cropping         |  |  |   |   |   |  |  |   | X |   |   |   | X |
| Economic and social cost and benefits of intensifying or reducing cropping   |  |  | X |   | X |  |  |   | X |   |   |   | X |
| Cost and benefits of afforesting of erodible lands                           |  |  |   | X | X |  |  | X |   | X | X | X |   |
| Cost and benefits of reconfiguring agricultural land use                     |  |  | X |   | X |  |  |   | X |   |   | X | X |
| Identification of optimal agricultural land use patterns based on ecological |  |  |   | X |   |  |  |   | X |   | X |   | X |



|                                                                                                  |  |  |  |  |  |  |  |  |  |  |  |  |  |
|--------------------------------------------------------------------------------------------------|--|--|--|--|--|--|--|--|--|--|--|--|--|
| and planning                                                                                     |  |  |  |  |  |  |  |  |  |  |  |  |  |
| Climate and risk                                                                                 |  |  |  |  |  |  |  |  |  |  |  |  |  |
| Environmental cost and benefits of dikes                                                         |  |  |  |  |  |  |  |  |  |  |  |  |  |
| Economic and social cost and benefits of dikes                                                   |  |  |  |  |  |  |  |  |  |  |  |  |  |
| The associated costs and benefits of microclimate as a result of habitat alteration              |  |  |  |  |  |  |  |  |  |  |  |  |  |
| Managing rockfall risk through land use planning and analyzing susceptibility in extensive areas |  |  |  |  |  |  |  |  |  |  |  |  |  |
| Management practices                                                                             |  |  |  |  |  |  |  |  |  |  |  |  |  |

|                                                                              |   |   |   |  |   |  |   |  |   |  |  |  |  |
|------------------------------------------------------------------------------|---|---|---|--|---|--|---|--|---|--|--|--|--|
| Identifying best management practices                                        |   | X |   |  |   |  |   |  | X |  |  |  |  |
| Evaluating management practices/strategies                                   | X | X |   |  | X |  | X |  | X |  |  |  |  |
| Cost and benefits of altering habitats                                       |   |   |   |  |   |  |   |  |   |  |  |  |  |
| Cost and benefits of degraded land rehabilitation                            |   |   |   |  |   |  |   |  |   |  |  |  |  |
| Environmental cost and benefits of restoration for impaired river ecosystems |   | X |   |  |   |  | X |  |   |  |  |  |  |
| Environmental cost and benefits of adaptation                                |   | X | X |  |   |  | X |  |   |  |  |  |  |

|                                                                                                                                                    |   |   |  |  |  |  |   |  |   |  |  |  |  |
|----------------------------------------------------------------------------------------------------------------------------------------------------|---|---|--|--|--|--|---|--|---|--|--|--|--|
| measures to the anthropic-related changes affecting directly or indirectly the water quantity and quality                                          |   |   |  |  |  |  |   |  |   |  |  |  |  |
| Economic cost and benefits of adaptation measures to the anthropic-related changes affecting directly or indirectly the water quantity and quality |   | X |  |  |  |  |   |  |   |  |  |  |  |
| Environmental cost-benefits of management strategies                                                                                               | X |   |  |  |  |  | X |  | X |  |  |  |  |

|                                                                  |   |  |  |  |  |  |   |  |   |  |  |  |  |
|------------------------------------------------------------------|---|--|--|--|--|--|---|--|---|--|--|--|--|
| Economic<br>cost-<br>benefits of<br>manageme<br>nt<br>strategies | X |  |  |  |  |  | X |  | X |  |  |  |  |
|------------------------------------------------------------------|---|--|--|--|--|--|---|--|---|--|--|--|--|
